# Supplementary material
Source: ML conference proceedings conference paper supplement (https://openreview.net/forum?id=zyRmy0Ch9a)
Supplement: supplementary_material [file Concrete_Data.xls]

## Sheet: Sheet1
Cement (component 1)(kg in a m^3 mixture)	Blast Furnace Slag (component 2)(kg in a m^3 mixture)	Fly Ash (component 3)(kg in a m^3 mixture)	Water (component 4)(kg in a m^3 mixture)	Superplasticizer (component 5)(kg in a m^3 mixture)	Coarse Aggregate (component 6)(kg in a m^3 mixture)	Fine Aggregate (component 7)(kg in a m^3 mixture)	Age (day)	Concrete compressive strength(MPa, megapascals)
540	0	0	162	2.5	1040	676	28	79.9861
540	0	0	162	2.5	1055	676	28	61.8874
332.5	142.5	0	228	0	932	594	270	40.2695
332.5	142.5	0	228	0	932	594	365	41.0528
198.6	132.4	0	192	0	978.4	825.5	360	44.2961
266	114	0	228	0	932	670	90	47.0298
380	95	0	228	0	932	594	365	43.6983
380	95	0	228	0	932	594	28	36.4478
266	114	0	228	0	932	670	28	45.8543
475	0	0	228	0	932	594	28	39.2898
198.6	132.4	0	192	0	978.4	825.5	90	38.0742
198.6	132.4	0	192	0	978.4	825.5	28	28.0217
427.5	47.5	0	228	0	932	594	270	43.013
190	190	0	228	0	932	670	90	42.3269
304	76	0	228	0	932	670	28	47.8138
380	0	0	228	0	932	670	90	52.9083
139.6	209.4	0	192	0	1047	806.9	90	39.358
342	38	0	228	0	932	670	365	56.142
380	95	0	228	0	932	594	90	40.5633
475	0	0	228	0	932	594	180	42.6206
427.5	47.5	0	228	0	932	594	180	41.8367
139.6	209.4	0	192	0	1047	806.9	28	28.2375
139.6	209.4	0	192	0	1047	806.9	3	8.06342
139.6	209.4	0	192	0	1047	806.9	180	44.2078
380	0	0	228	0	932	670	365	52.5167
380	0	0	228	0	932	670	270	53.3006
380	95	0	228	0	932	594	270	41.1514
342	38	0	228	0	932	670	180	52.1244
427.5	47.5	0	228	0	932	594	28	37.4275
475	0	0	228	0	932	594	7	38.6038
304	76	0	228	0	932	670	365	55.2601
266	114	0	228	0	932	670	365	52.9083
198.6	132.4	0	192	0	978.4	825.5	180	41.7195
475	0	0	228	0	932	594	270	42.1311
190	190	0	228	0	932	670	365	53.6923
237.5	237.5	0	228	0	932	594	270	38.408
237.5	237.5	0	228	0	932	594	28	30.0798
332.5	142.5	0	228	0	932	594	90	37.7219
475	0	0	228	0	932	594	90	42.229
237.5	237.5	0	228	0	932	594	180	36.252
342	38	0	228	0	932	670	90	50.4593
427.5	47.5	0	228	0	932	594	365	43.6983
237.5	237.5	0	228	0	932	594	365	38.9954
380	0	0	228	0	932	670	180	53.1041
427.5	47.5	0	228	0	932	594	90	41.543
427.5	47.5	0	228	0	932	594	7	35.0764
349	0	0	192	0	1047	806.9	3	15.0492
380	95	0	228	0	932	594	180	40.7591
237.5	237.5	0	228	0	932	594	7	26.258
380	95	0	228	0	932	594	7	32.8232
332.5	142.5	0	228	0	932	594	180	39.7793
190	190	0	228	0	932	670	180	46.9319
237.5	237.5	0	228	0	932	594	90	33.1169
304	76	0	228	0	932	670	90	49.1851
139.6	209.4	0	192	0	1047	806.9	7	14.5893
198.6	132.4	0	192	0	978.4	825.5	7	14.6383
475	0	0	228	0	932	594	365	41.9346
198.6	132.4	0	192	0	978.4	825.5	3	9.13142
304	76	0	228	0	932	670	180	50.9488
332.5	142.5	0	228	0	932	594	28	33.019
304	76	0	228	0	932	670	270	54.3783
266	114	0	228	0	932	670	270	51.7328
310	0	0	192	0	971	850.6	3	9.8664
190	190	0	228	0	932	670	270	50.6551
266	114	0	228	0	932	670	180	48.6956
342	38	0	228	0	932	670	270	55.0643
139.6	209.4	0	192	0	1047	806.9	360	44.698
332.5	142.5	0	228	0	932	594	7	30.2756
190	190	0	228	0	932	670	28	40.857
485	0	0	146	0	1120	800	28	71.9882
374	189.2	0	170.1	10.1	926.1	756.7	3	34.398
313.3	262.2	0	175.5	8.6	1046.9	611.8	3	28.7994
425	106.3	0	153.5	16.5	852.1	887.1	3	33.3982
425	106.3	0	151.4	18.6	936	803.7	3	36.3009
375	93.8	0	126.6	23.4	852.1	992.6	3	28.9994
475	118.8	0	181.1	8.9	852.1	781.5	3	37.7971
469	117.2	0	137.8	32.2	852.1	840.5	3	40.1965
425	106.3	0	153.5	16.5	852.1	887.1	3	33.3982
388.6	97.1	0	157.9	12.1	852.1	925.7	3	28.0961
531.3	0	0	141.8	28.2	852.1	893.7	3	41.2996
425	106.3	0	153.5	16.5	852.1	887.1	3	33.3982
318.8	212.5	0	155.7	14.3	852.1	880.4	3	25.2003
401.8	94.7	0	147.4	11.4	946.8	852.1	3	41.0997
362.6	189	0	164.9	11.6	944.7	755.8	3	35.3012
323.7	282.8	0	183.8	10.3	942.7	659.9	3	28.2961
379.5	151.2	0	153.9	15.9	1134.3	605	3	28.5995
362.6	189	0	164.9	11.6	944.7	755.8	3	35.3012
286.3	200.9	0	144.7	11.2	1004.6	803.7	3	24.4006
362.6	189	0	164.9	11.6	944.7	755.8	3	35.3012
439	177	0	186	11.1	884.9	707.9	3	39.3001
389.9	189	0	145.9	22	944.7	755.8	3	40.5963
362.6	189	0	164.9	11.6	944.7	755.8	3	35.3012
337.9	189	0	174.9	9.5	944.7	755.8	3	24.0972
374	189.2	0	170.1	10.1	926.1	756.7	7	46.2018
313.3	262.2	0	175.5	8.6	1046.9	611.8	7	42.7958
425	106.3	0	153.5	16.5	852.1	887.1	7	49.201
425	106.3	0	151.4	18.6	936	803.7	7	46.8016
375	93.8	0	126.6	23.4	852.1	992.6	7	45.6985
475	118.8	0	181.1	8.9	852.1	781.5	7	55.5993
469	117.2	0	137.8	32.2	852.1	840.5	7	54.8961
425	106.3	0	153.5	16.5	852.1	887.1	7	49.201
388.6	97.1	0	157.9	12.1	852.1	925.7	7	34.9013
531.3	0	0	141.8	28.2	852.1	893.7	7	46.8982
425	106.3	0	153.5	16.5	852.1	887.1	7	49.201
318.8	212.5	0	155.7	14.3	852.1	880.4	7	33.3982
401.8	94.7	0	147.4	11.4	946.8	852.1	7	54.0963
362.6	189	0	164.9	11.6	944.7	755.8	7	55.8958
323.7	282.8	0	183.8	10.3	942.7	659.9	7	49.8009
379.5	151.2	0	153.9	15.9	1134.3	605	7	47.0981
362.6	189	0	164.9	11.6	944.7	755.8	7	55.8958
286.3	200.9	0	144.7	11.2	1004.6	803.7	7	37.997
362.6	189	0	164.9	11.6	944.7	755.8	7	55.8958
439	177	0	186	11.1	884.9	707.9	7	56.0958
389.9	189	0	145.9	22	944.7	755.8	7	59.095
362.6	189	0	164.9	11.6	944.7	755.8	7	22.8975
337.9	189	0	174.9	9.5	944.7	755.8	7	35.1012
374	189.2	0	170.1	10.1	926.1	756.7	28	61.0945
313.3	262.2	0	175.5	8.6	1046.9	611.8	28	59.7983
425	106.3	0	153.5	16.5	852.1	887.1	28	60.2947
425	106.3	0	151.4	18.6	936	803.7	28	61.7977
375	93.8	0	126.6	23.4	852.1	992.6	28	56.6956
475	118.8	0	181.1	8.9	852.1	781.5	28	68.2995
469	117.2	0	137.8	32.2	852.1	840.5	28	66.8999
425	106.3	0	153.5	16.5	852.1	887.1	28	60.2947
388.6	97.1	0	157.9	12.1	852.1	925.7	28	50.6972
531.3	0	0	141.8	28.2	852.1	893.7	28	56.3991
425	106.3	0	153.5	16.5	852.1	887.1	28	60.2947
318.8	212.5	0	155.7	14.3	852.1	880.4	28	55.4959
401.8	94.7	0	147.4	11.4	946.8	852.1	28	68.4994
362.6	189	0	164.9	11.6	944.7	755.8	28	71.2987
323.7	282.8	0	183.8	10.3	942.7	659.9	28	74.6978
379.5	151.2	0	153.9	15.9	1134.3	605	28	52.2002
362.6	189	0	164.9	11.6	944.7	755.8	28	71.2987
286.3	200.9	0	144.7	11.2	1004.6	803.7	28	67.6996
362.6	189	0	164.9	11.6	944.7	755.8	28	71.2987
439	177	0	186	11.1	884.9	707.9	28	65.9966
389.9	189	0	145.9	22	944.7	755.8	28	74.4979
362.6	189	0	164.9	11.6	944.7	755.8	28	71.2987
337.9	189	0	174.9	9.5	944.7	755.8	28	49.8974
374	189.2	0	170.1	10.1	926.1	756.7	56	63.3973
313.3	262.2	0	175.5	8.6	1046.9	611.8	56	64.9004
425	106.3	0	153.5	16.5	852.1	887.1	56	64.3005
425	106.3	0	151.4	18.6	936	803.7	56	64.9004
375	93.8	0	126.6	23.4	852.1	992.6	56	60.1981
475	118.8	0	181.1	8.9	852.1	781.5	56	72.2985
469	117.2	0	137.8	32.2	852.1	840.5	56	69.2992
425	106.3	0	153.5	16.5	852.1	887.1	56	64.3005
388.6	97.1	0	157.9	12.1	852.1	925.7	56	55.1994
531.3	0	0	141.8	28.2	852.1	893.7	56	58.7985
425	106.3	0	153.5	16.5	852.1	887.1	56	64.3005
318.8	212.5	0	155.7	14.3	852.1	880.4	56	66.1001
401.8	94.7	0	147.4	11.4	946.8	852.1	56	73.6981
362.6	189	0	164.9	11.6	944.7	755.8	56	77.2972
323.7	282.8	0	183.8	10.3	942.7	659.9	56	80.1998
379.5	151.2	0	153.9	15.9	1134.3	605	56	54.8961
362.6	189	0	164.9	11.6	944.7	755.8	56	77.2972
286.3	200.9	0	144.7	11.2	1004.6	803.7	56	72.9948
362.6	189	0	164.9	11.6	944.7	755.8	56	77.2972
439	177	0	186	11.1	884.9	707.9	56	71.6986
389.9	189	0	145.9	22	944.7	755.8	56	79.4001
362.6	189	0	164.9	11.6	944.7	755.8	56	77.2972
337.9	189	0	174.9	9.5	944.7	755.8	56	59.8948
374	189.2	0	170.1	10.1	926.1	756.7	91	64.9004
313.3	262.2	0	175.5	8.6	1046.9	611.8	91	66.5965
425	106.3	0	153.5	16.5	852.1	887.1	91	65.1969
425	106.3	0	151.4	18.6	936	803.7	91	66.6999
375	93.8	0	126.6	23.4	852.1	992.6	91	62.501
475	118.8	0	181.1	8.9	852.1	781.5	91	74.1945
469	117.2	0	137.8	32.2	852.1	840.5	91	70.6989
425	106.3	0	153.5	16.5	852.1	887.1	91	65.1969
388.6	97.1	0	157.9	12.1	852.1	925.7	91	57.5988
531.3	0	0	141.8	28.2	852.1	893.7	91	59.1984
425	106.3	0	153.5	16.5	852.1	887.1	91	65.1969
318.8	212.5	0	155.7	14.3	852.1	880.4	91	68.0995
401.8	94.7	0	147.4	11.4	946.8	852.1	91	75.4976
362.6	189	0	164.9	11.6	944.7	755.8	91	79.2966
379.5	151.2	0	153.9	15.9	1134.3	605	91	56.4957
362.6	189	0	164.9	11.6	944.7	755.8	91	79.2966
286.3	200.9	0	144.7	11.2	1004.6	803.7	91	76.8007
362.6	189	0	164.9	11.6	944.7	755.8	91	79.2966
439	177	0	186	11.1	884.9	707.9	91	73.2982
389.9	189	0	145.9	22	944.7	755.8	91	82.5992
362.6	189	0	164.9	11.6	944.7	755.8	91	79.2966
337.9	189	0	174.9	9.5	944.7	755.8	91	67.7962
222.36	0	96.67	189.29	4.46	967.08	870.32	3	11.5763
222.36	0	96.67	189.29	4.46	967.08	870.32	14	24.4488
222.36	0	96.67	189.29	4.46	967.08	870.32	28	24.8901
222.36	0	96.67	189.29	4.46	967.08	870.32	56	29.4475
222.36	0	96.67	189.29	4.46	967.08	870.32	100	40.7136
233.81	0	94.58	197.89	4.567	947.04	852.16	3	10.3835
233.81	0	94.58	197.89	4.567	947.04	852.16	14	22.1391
233.81	0	94.58	197.89	4.567	947.04	852.16	28	22.8354
233.81	0	94.58	197.89	4.567	947.04	852.16	56	27.6618
233.81	0	94.58	197.89	4.567	947.04	852.16	100	34.5565
194.68	0	100.52	165.62	7.48	1006.4	905.9	3	12.4519
194.68	0	100.52	165.62	7.48	1006.4	905.9	14	24.9866
194.68	0	100.52	165.62	7.48	1006.4	905.9	28	25.7243
194.68	0	100.52	165.62	7.48	1006.4	905.9	56	33.9636
194.68	0	100.52	165.62	7.48	1006.4	905.9	100	37.342
190.68	0	125.4	162.14	7.77	1090	804.01	3	15.0444
190.68	0	125.4	162.14	7.77	1090	804.01	14	21.0635
190.68	0	125.4	162.14	7.77	1090	804.01	28	26.4
190.68	0	125.4	162.14	7.77	1090	804.01	56	35.3425
190.68	0	125.4	162.14	7.77	1090	804.01	100	40.5688
212.07	0	121.62	180.31	5.69	1057.6	779.32	3	12.4726
212.07	0	121.62	180.31	5.69	1057.6	779.32	14	20.9187
212.07	0	121.62	180.31	5.69	1057.6	779.32	28	24.9039
212.07	0	121.62	180.31	5.69	1057.6	779.32	56	34.2049
212.07	0	121.62	180.31	5.69	1057.6	779.32	100	39.6104
229.97	0	118.31	195.47	4.63	1029.4	758.59	3	10.0319
229.97	0	118.31	195.47	4.63	1029.4	758.59	14	20.0844
229.97	0	118.31	195.47	4.63	1029.4	758.59	28	24.4833
229.97	0	118.31	195.47	4.63	1029.4	758.59	56	31.5366
229.97	0	118.31	195.47	4.63	1029.4	758.59	100	35.3425
190.34	0	125.18	161.85	9.88	1088.1	802.59	3	9.44582
190.34	0	125.18	161.85	9.88	1088.1	802.59	14	22.7182
190.34	0	125.18	161.85	9.88	1088.1	802.59	28	28.4685
190.34	0	125.18	161.85	9.88	1088.1	802.59	56	38.5624
190.34	0	125.18	161.85	9.88	1088.1	802.59	100	40.3895
166.09	0	163.27	176.46	4.49	1058.6	780.09	3	10.7627
166.09	0	163.27	176.46	4.49	1058.6	780.09	14	25.483
166.09	0	163.27	176.46	4.49	1058.6	780.09	28	21.5392
166.09	0	163.27	176.46	4.49	1058.6	780.09	56	28.627
166.09	0	163.27	176.46	4.49	1058.6	780.09	100	33.543
167.95	42.08	163.83	121.75	5.72	1058.7	780.11	3	7.74971
167.95	42.08	163.83	121.75	5.72	1058.7	780.11	14	17.823
167.95	42.08	163.83	121.75	5.72	1058.7	780.11	28	24.242
167.95	42.08	163.83	121.75	5.72	1058.7	780.11	56	32.8535
167.95	42.08	163.83	121.75	5.72	1058.7	780.11	100	39.2312
213.72	98.05	24.51	181.71	6.86	1065.8	785.38	3	17.9953
213.72	98.05	24.51	181.71	6.86	1065.8	785.38	14	30.3852
213.72	98.05	24.51	181.71	6.86	1065.8	785.38	28	45.7054
213.72	98.05	24.51	181.71	6.86	1065.8	785.38	56	50.773
213.72	98.05	24.51	181.71	6.86	1065.8	785.38	100	53.9032
213.76	98.06	24.52	181.74	6.65	1066	785.52	3	13.1828
213.76	98.06	24.52	181.74	6.65	1066	785.52	14	17.8367
213.76	98.06	24.52	181.74	6.65	1066	785.52	28	40.2309
213.76	98.06	24.52	181.74	6.65	1066	785.52	56	47.1326
213.76	98.06	24.52	181.74	6.65	1066	785.52	100	49.9732
229.68	0	118.16	195.23	6.13	1028.1	757.63	3	13.3552
229.68	0	118.16	195.23	6.13	1028.1	757.63	14	22.3183
229.68	0	118.16	195.23	6.13	1028.1	757.63	28	24.5385
229.68	0	118.16	195.23	6.13	1028.1	757.63	56	31.3505
229.68	0	118.16	195.23	6.13	1028.1	757.63	100	40.8583
238.05	0	94.11	186.66	7	949.91	847.01	3	19.9328
238.05	0	94.11	186.66	7	949.91	847.01	14	25.6899
238.05	0	94.11	186.66	7	949.91	847.01	28	30.2335
238.05	0	94.11	186.66	7	949.91	847.01	56	39.5897
238.05	0	94.11	186.66	7	949.91	847.01	100	44.2988
250	0	95.69	187.42	5.53	956.86	861.17	3	13.8171
250	0	95.69	187.42	5.53	956.86	861.17	14	24.9177
250	0	95.69	187.42	5.53	956.86	861.17	28	29.22
250	0	95.69	187.42	5.53	956.86	861.17	56	38.328
250	0	95.69	187.42	5.53	956.86	861.17	100	42.3476
212.52	0	100.37	159.32	8.71	1007.8	903.59	3	13.5413
212.52	0	100.37	159.32	8.71	1007.8	903.59	14	26.3104
212.52	0	100.37	159.32	8.71	1007.8	903.59	28	31.6401
212.52	0	100.37	159.32	8.71	1007.8	903.59	56	42.5476
212.52	0	100.37	159.32	8.71	1007.8	903.59	100	42.9199
212.57	0	100.39	159.35	10.37	1003.8	903.79	3	13.3345
212.57	0	100.39	159.35	10.37	1003.8	903.79	14	25.3727
212.57	0	100.39	159.35	10.37	1003.8	903.79	28	37.4041
212.57	0	100.39	159.35	10.37	1003.8	903.79	56	44.3954
212.57	0	100.39	159.35	10.37	1003.8	903.79	100	47.7393
212	0	124.78	159	7.84	1085.4	799.54	3	19.5191
212	0	124.78	159	7.84	1085.4	799.54	14	31.3505
212	0	124.78	159	7.84	1085.4	799.54	28	38.5003
212	0	124.78	159	7.84	1085.4	799.54	56	45.0848
212	0	124.78	159	7.84	1085.4	799.54	100	47.8152
231.75	0	121.62	173.96	6.72	1056.4	778.45	3	15.4374
231.75	0	121.62	173.96	6.72	1056.4	778.45	14	26.7724
231.75	0	121.62	173.96	6.72	1056.4	778.45	28	33.7292
231.75	0	121.62	173.96	6.72	1056.4	778.45	56	42.6992
231.75	0	121.62	173.96	6.72	1056.4	778.45	100	45.8364
251.37	0	118.27	188.45	5.75	1028.4	757.73	3	17.2231
251.37	0	118.27	188.45	5.75	1028.4	757.73	14	29.9302
251.37	0	118.27	188.45	5.75	1028.4	757.73	28	29.6544
251.37	0	118.27	188.45	5.75	1028.4	757.73	56	36.9697
251.37	0	118.27	188.45	5.75	1028.4	757.73	100	43.5818
251.37	0	118.27	188.45	6.35	1028.4	757.73	3	13.1207
251.37	0	118.27	188.45	6.35	1028.4	757.73	14	24.4281
251.37	0	118.27	188.45	6.35	1028.4	757.73	28	32.6605
251.37	0	118.27	188.45	6.35	1028.4	757.73	56	36.6388
251.37	0	118.27	188.45	6.35	1028.4	757.73	100	44.2092
181.38	0	167.01	169.59	7.56	1055.6	777.8	3	13.624
181.38	0	167.01	169.59	7.56	1055.6	777.8	14	21.6013
181.38	0	167.01	169.59	7.56	1055.6	777.8	28	27.7721
181.38	0	167.01	169.59	7.56	1055.6	777.8	56	35.5701
181.38	0	167.01	169.59	7.56	1055.6	777.8	100	45.3675
182.04	45.21	121.97	170.21	8.19	1059.4	780.65	3	7.31534
182.04	45.21	121.97	170.21	8.19	1059.4	780.65	14	21.5048
182.04	45.21	121.97	170.21	8.19	1059.4	780.65	28	31.2677
182.04	45.21	121.97	170.21	8.19	1059.4	780.65	56	43.499
182.04	45.21	121.97	170.21	8.19	1059.4	780.65	100	48.6701
168.88	42.22	124.25	158.33	10.83	1080.8	796.15	3	7.39808
168.88	42.22	124.25	158.33	10.83	1080.8	796.15	14	23.5111
168.88	42.22	124.25	158.33	10.83	1080.8	796.15	28	31.1161
168.88	42.22	124.25	158.33	10.83	1080.8	796.15	56	39.1484
168.88	42.22	124.25	158.33	10.83	1080.8	796.15	100	48.153
290.35	0	96.18	168.08	9.41	961.18	865	3	22.5045
290.35	0	96.18	168.08	9.41	961.18	865	14	34.6737
290.35	0	96.18	168.08	9.41	961.18	865	28	34.7358
290.35	0	96.18	168.08	9.41	961.18	865	56	45.0848
290.35	0	96.18	168.08	9.41	961.18	865	100	48.9735
277.05	0	97.39	160.6	11.83	973.9	875.61	3	23.1388
277.05	0	97.39	160.6	11.83	973.9	875.61	14	41.8857
277.05	0	97.39	160.6	11.83	973.9	875.61	28	48.284
277.05	0	97.39	160.6	11.83	973.9	875.61	56	51.035
277.05	0	97.39	160.6	11.83	973.9	875.61	100	55.6407
295.71	0	95.64	171.54	8.87	955.14	859.2	3	22.9458
295.71	0	95.64	171.54	8.87	955.14	859.2	14	35.2322
295.71	0	95.64	171.54	8.87	955.14	859.2	28	39.9413
295.71	0	95.64	171.54	8.87	955.14	859.2	56	48.7184
295.71	0	95.64	171.54	8.87	955.14	859.2	100	52.0416
251.81	0	99.94	146.14	12.35	1006	899.76	3	21.0221
251.81	0	99.94	146.14	12.35	1006	899.76	14	33.3568
251.81	0	99.94	146.14	12.35	1006	899.76	28	33.9429
251.81	0	99.94	146.14	12.35	1006	899.76	56	44.1403
251.81	0	99.94	146.14	12.35	1006	899.76	100	45.3675
249.1	0	98.75	158.11	12.8	987.76	889.01	3	15.3615
249.1	0	98.75	158.11	12.8	987.76	889.01	14	28.6822
249.1	0	98.75	158.11	12.8	987.76	889.01	28	30.8472
249.1	0	98.75	158.11	12.8	987.76	889.01	56	42.0305
249.1	0	98.75	158.11	12.8	987.76	889.01	100	51.0557
252.31	0	98.75	146.25	14.17	987.76	889.01	3	21.7805
252.31	0	98.75	146.25	14.17	987.76	889.01	14	42.2925
252.31	0	98.75	146.25	14.17	987.76	889.01	28	50.6006
252.31	0	98.75	146.25	14.17	987.76	889.01	56	55.8269
252.31	0	98.75	146.25	14.17	987.76	889.01	100	60.9497
246.83	0	125.08	143.3	11.99	1086.8	800.89	3	23.5249
246.83	0	125.08	143.3	11.99	1086.8	800.89	14	42.2166
246.83	0	125.08	143.3	11.99	1086.8	800.89	28	52.5036
246.83	0	125.08	143.3	11.99	1086.8	800.89	56	60.3223
246.83	0	125.08	143.3	11.99	1086.8	800.89	100	66.4241
275.07	0	121.35	159.48	9.9	1053.6	777.5	3	23.8007
275.07	0	121.35	159.48	9.9	1053.6	777.5	14	38.7692
275.07	0	121.35	159.48	9.9	1053.6	777.5	28	51.3315
275.07	0	121.35	159.48	9.9	1053.6	777.5	56	56.8473
275.07	0	121.35	159.48	9.9	1053.6	777.5	100	58.6055
297.16	0	117.54	174.8	9.52	1022.8	753.45	3	21.9115
297.16	0	117.54	174.8	9.52	1022.8	753.45	14	36.9904
297.16	0	117.54	174.8	9.52	1022.8	753.45	28	47.4015
297.16	0	117.54	174.8	9.52	1022.8	753.45	56	51.9589
297.16	0	117.54	174.8	9.52	1022.8	753.45	100	56.7439
213.74	0	174.74	154.79	10.16	1053.5	776.35	3	17.5747
213.74	0	174.74	154.79	10.16	1053.5	776.35	14	33.7292
213.74	0	174.74	154.79	10.16	1053.5	776.35	28	40.1482
213.74	0	174.74	154.79	10.16	1053.5	776.35	56	46.6431
213.74	0	174.74	154.79	10.16	1053.5	776.35	100	50.0766
213.5	0	174.24	154.61	11.66	1052.3	775.48	3	17.3679
213.5	0	174.24	154.61	11.66	1052.3	775.48	14	33.7016
213.5	0	174.24	154.61	11.66	1052.3	775.48	28	45.9398
213.5	0	174.24	154.61	11.66	1052.3	775.48	56	51.4349
213.5	0	174.24	154.61	11.66	1052.3	775.48	100	59.3018
277.19	97.82	24.46	160.7	11.19	1061.7	782.46	3	30.4473
277.19	97.82	24.46	160.7	11.19	1061.7	782.46	14	47.7117
277.19	97.82	24.46	160.7	11.19	1061.7	782.46	28	63.1422
277.19	97.82	24.46	160.7	11.19	1061.7	782.46	56	66.824
277.19	97.82	24.46	160.7	11.19	1061.7	782.46	100	66.9481
218.23	54.64	123.78	140.75	11.91	1075.7	792.67	3	27.4205
218.23	54.64	123.78	140.75	11.91	1075.7	792.67	14	35.9562
218.23	54.64	123.78	140.75	11.91	1075.7	792.67	28	55.5097
218.23	54.64	123.78	140.75	11.91	1075.7	792.67	56	61.9908
218.23	54.64	123.78	140.75	11.91	1075.7	792.67	100	63.5283
214.9	53.8	121.89	155.63	9.61	1014.3	780.58	3	18.016
214.9	53.8	121.89	155.63	9.61	1014.3	780.58	14	38.6038
214.9	53.8	121.89	155.63	9.61	1014.3	780.58	28	52.2002
214.9	53.8	121.89	155.63	9.61	1014.3	780.58	56	53.9584
214.9	53.8	121.89	155.63	9.61	1014.3	780.58	100	56.6336
218.85	0	124.13	158.49	11.33	1078.7	794.91	3	15.3408
218.85	0	124.13	158.49	11.33	1078.7	794.91	14	26.0484
218.85	0	124.13	158.49	11.33	1078.7	794.91	28	30.2197
218.85	0	124.13	158.49	11.33	1078.7	794.91	56	37.2662
218.85	0	124.13	158.49	11.33	1078.7	794.91	100	46.2294
376	0	0	214.6	0	1003.5	762.36	3	16.2785
376	0	0	214.6	0	1003.5	762.36	14	25.6209
376	0	0	214.6	0	1003.5	762.36	28	31.971
376	0	0	214.6	0	1003.5	762.36	56	36.3009
376	0	0	214.6	0	1003.5	762.36	100	43.0578
500	0	0	140	4	966	853	28	67.5686
475	0	59	142	1.9	1098	641	28	57.2265
315	137	0	145	5.9	1130	745	28	81.7512
505	0	60	195	0	1030	630	28	64.0178
451	0	0	165	11.25	1030	745	28	78.8002
516	0	0	162	8.2	801	802	28	41.3686
520	0	0	170	5.2	855	855	28	60.2809
528	0	0	185	6.86	920	720	28	56.8335
520	0	0	175	5.2	870	805	28	51.0212
385	0	136	158	20	903	768	28	55.5511
500.1	0	0	200	3	1124.4	613.2	28	44.1334
450.1	50	0	200	3	1124.4	613.2	28	39.376
397	17.2	158	167	20.8	967	633	28	55.6476
333	17.5	163	167	17.9	996	652	28	47.2774
334	17.6	158	189	15.3	967	633	28	44.3264
405	0	0	175	0	1120	695	28	52.3036
200	200	0	190	0	1145	660	28	49.2493
516	0	0	162	8.26	801	802	28	41.3686
145	116	119	184	5.7	833	880	28	29.1579
160	128	122	182	6.4	824	879	28	39.3967
234	156	0	189	5.85	981	760	28	39.3001
250	180	95	159	9.45	860	800	28	67.8651
475	0	0	162	9.5	1044	662	28	58.5227
285	190	0	163	7.6	1031	685	28	53.5792
356	119	0	160	9.03	1061	657	28	58.9985
275	180	120	162	10.35	830	765	28	76.2354
500	0	0	151	9	1033	655	28	69.837
165	0.02	143.57	163.81	0	1005.6	900.9	3	14.3963
165	128.5	132.1	175.06	8.08	1005.8	746.6	3	19.4156
178.03	129.8	118.6	179.94	3.57	1007.3	746.8	3	20.7256
167.35	129.9	128.62	175.46	7.79	1006.3	746.6	3	14.9409
172.38	13.61	172.37	156.76	4.14	1006.3	856.4	3	21.291
173.54	50.05	173.53	164.77	6.47	1006.2	793.5	3	23.0768
167	75.4	167	164.03	7.91	1007.3	770.1	3	15.5201
173.81	93.37	159.9	172.34	9.73	1007.2	746.6	3	15.8166
190.34	0	125.18	166.61	9.88	1079	798.9	3	12.5485
250	0	95.69	191.84	5.33	948.9	857.2	3	8.48745
213.5	0	174.24	159.21	11.66	1043.6	771.9	3	15.6097
194.68	0	100.52	170.17	7.48	998	901.8	3	12.1761
251.37	0	118.27	192.94	5.75	1043.6	754.3	3	11.9831
165	0.02	143.57	163.81	0	1005.6	900.9	14	16.8784
165	128.5	132.1	175.06	8.08	1005.8	746.6	14	33.088
178.03	129.8	118.6	179.94	3.57	1007.3	746.8	14	34.2394
167.35	129.9	128.62	175.46	7.79	1006.3	746.6	14	31.8124
172.38	13.61	172.37	156.76	4.14	1006.3	856.4	14	29.7509
173.54	50.05	173.53	164.77	6.47	1006.2	793.5	14	33.0052
167	75.4	167	164.03	7.91	1007.3	770.1	14	32.9018
173.81	93.37	159.9	172.34	9.73	1007.2	746.6	14	29.5509
190.34	0	125.18	166.61	9.88	1079	798.9	14	19.4156
250	0	95.69	191.84	5.33	948.9	857.2	14	24.6557
213.5	0	174.24	159.21	11.66	1043.6	771.9	14	29.5923
194.68	0	100.52	170.17	7.48	998	901.8	14	24.2833
251.37	0	118.27	192.94	5.75	1043.6	754.3	14	20.7256
165	0.02	143.57	163.81	0	1005.6	900.9	28	26.2001
165	128.5	132.1	175.06	8.08	1005.8	746.6	28	46.3879
178.03	129.8	118.6	179.94	3.57	1007.3	746.8	28	39.1622
167.35	129.9	128.62	175.46	7.79	1006.3	746.6	28	41.2031
172.38	13.61	172.37	156.76	4.14	1006.3	856.4	28	33.6878
173.54	50.05	173.53	164.77	6.47	1006.2	793.5	28	38.2039
167	75.4	167	164.03	7.91	1007.3	770.1	28	41.4099
173.81	93.37	159.9	172.34	9.73	1007.2	746.6	28	37.8109
190.34	0	125.18	166.61	9.88	1079	798.9	28	24.8487
250	0	95.69	191.84	5.33	948.9	857.2	28	27.2205
213.5	0	174.24	159.21	11.66	1043.6	771.9	28	44.6367
194.68	0	100.52	170.17	7.48	998	901.8	28	37.2662
251.37	0	118.27	192.94	5.75	1043.6	754.3	28	33.2741
165	0.02	143.57	163.81	0	1005.6	900.9	56	36.5629
165	128.5	132.1	175.06	8.08	1005.8	746.6	56	53.724
178.03	129.8	118.6	179.94	3.57	1007.3	746.8	56	48.5874
167.35	129.9	128.62	175.46	7.79	1006.3	746.6	56	51.7245
172.38	13.61	172.37	156.76	4.14	1006.3	856.4	56	35.8528
173.54	50.05	173.53	164.77	6.47	1006.2	793.5	56	53.7722
167	75.4	167	164.03	7.91	1007.3	770.1	56	53.462
173.81	93.37	159.9	172.34	9.73	1007.2	746.6	56	48.9873
190.34	0	125.18	166.61	9.88	1079	798.9	56	31.7159
250	0	95.69	191.84	5.33	948.9	857.2	56	39.6449
213.5	0	174.24	159.21	11.66	1043.6	771.9	56	51.2556
194.68	0	100.52	170.17	7.48	998	901.8	56	43.3887
251.37	0	118.27	192.94	5.75	1043.6	754.3	56	39.2657
165	0.02	143.57	163.81	0	1005.6	900.9	100	37.9557
165	128.5	132.1	175.06	8.08	1005.8	746.6	100	55.0202
178.03	129.8	118.6	179.94	3.57	1007.3	746.8	100	49.9939
167.35	129.9	128.62	175.46	7.79	1006.3	746.6	100	53.655
172.38	13.61	172.37	156.76	4.14	1006.3	856.4	100	37.6799
173.54	50.05	173.53	164.77	6.47	1006.2	793.5	100	56.0613
167	75.4	167	164.03	7.91	1007.3	770.1	100	56.8128
173.81	93.37	159.9	172.34	9.73	1007.2	746.6	100	50.9385
190.34	0	125.18	166.61	9.88	1079	798.9	100	33.5637
250	0	95.69	191.84	5.33	948.9	857.2	100	41.1617
213.5	0	174.24	159.21	11.66	1043.6	771.9	100	52.9587
194.68	0	100.52	170.17	7.48	998	901.8	100	44.2781
251.37	0	118.27	192.94	5.75	1043.6	754.3	100	40.1482
446	24	79	162	11.61	967	712	28	57.0266
446	24	79	162	11.64	967	712	28	44.4229
446	24	79	162	11.64	967	712	28	51.0212
446	24	79	162	10.3	967	712	28	53.3861
446	24	79	162	11.61	967	712	3	35.3632
446	24	79	162	11.64	967	712	3	25.0211
446	24	79	162	11.64	967	712	3	23.3457
446	24	79	162	11.61	967	712	7	52.0072
446	24	79	162	11.64	967	712	7	38.0177
446	24	79	162	11.64	967	712	7	39.3001
446	24	79	162	11.61	967	712	56	61.0669
446	24	79	162	11.64	967	712	56	56.144
446	24	79	162	11.64	967	712	56	55.2546
446	24	79	162	10.3	967	712	56	54.7651
387	20	94	157	14.32	938	845	28	50.2352
387	20	94	157	13.93	938	845	28	46.6844
387	20	94	157	11.61	938	845	28	46.6844
387	20	94	157	14.32	938	845	3	22.7527
387	20	94	157	13.93	938	845	3	25.5106
387	20	94	157	11.61	938	845	3	34.7703
387	20	94	157	14.32	938	845	7	36.8387
387	20	94	157	13.93	938	845	7	45.8984
387	20	94	157	11.61	938	845	7	41.665
387	20	94	157	14.32	938	845	56	56.3371
387	20	94	157	13.93	938	845	56	47.9668
387	20	94	157	11.61	938	845	56	61.4599
355	19	97	145	13.13	967	871	28	44.0299
355	19	97	145	12.25	967	871	28	55.4546
491	26	123	210	3.93	882	699	28	55.5511
491	26	123	201	3.93	822	699	28	57.916
491	26	123	210	3.93	882	699	3	25.6091
491	26	123	210	3.93	882	699	7	33.4888
491	26	123	210	3.93	882	699	56	59.5904
491	26	123	201	3.93	822	699	3	29.549
491	26	123	201	3.93	822	699	7	37.9212
491	26	123	201	3.93	822	699	56	61.8558
424	22	132	178	8.48	822	750	28	62.0528
424	22	132	178	8.48	882	750	3	32.0114
424	22	132	168	8.92	822	750	28	72.0985
424	22	132	178	8.48	822	750	7	39.0046
424	22	132	178	8.48	822	750	56	65.6972
424	22	132	168	8.92	822	750	3	32.1099
424	22	132	168	8.92	822	750	7	40.2851
424	22	132	168	8.92	822	750	56	74.3649
202	11	141	206	1.72	942	801	28	21.9667
202	11	141	206	1.72	942	801	3	9.84966
202	11	141	206	1.72	942	801	7	15.07
202	11	141	206	1.72	942	801	56	23.2452
284	15	141	179	5.46	842	801	28	43.7335
284	15	141	179	5.46	842	801	3	13.3955
284	15	141	179	5.46	842	801	7	24.1317
284	15	141	179	5.46	842	801	56	44.5205
359	19	141	154	10.91	942	801	28	62.9354
359	19	141	154	10.91	942	801	28	59.4949
359	19	141	154	10.91	942	801	3	25.1166
359	19	141	154	10.91	942	801	3	23.6392
359	19	141	154	10.91	942	801	7	35.7543
359	19	141	154	10.91	942	801	7	38.6107
359	19	141	154	10.91	942	801	56	68.7506
359	19	141	154	10.91	942	801	56	66.7807
436	0	0	218	0	838.4	719.7	28	23.849
289	0	0	192	0	913.2	895.3	90	32.0682
289	0	0	192	0	913.2	895.3	3	11.6549
393	0	0	192	0	940.6	785.6	3	19.1991
393	0	0	192	0	940.6	785.6	90	48.8466
393	0	0	192	0	940.6	785.6	28	39.6049
480	0	0	192	0	936.2	712.2	28	43.9424
480	0	0	192	0	936.2	712.2	7	34.5696
480	0	0	192	0	936.2	712.2	90	54.3155
480	0	0	192	0	936.2	712.2	3	24.4047
333	0	0	192	0	931.2	842.6	3	15.6159
255	0	0	192	0	889.8	945	90	21.8591
255	0	0	192	0	889.8	945	7	10.2222
289	0	0	192	0	913.2	895.3	7	14.5969
255	0	0	192	0	889.8	945	28	18.7462
333	0	0	192	0	931.2	842.6	28	31.9669
333	0	0	192	0	931.2	842.6	7	23.405
289	0	0	192	0	913.2	895.3	28	25.5734
333	0	0	192	0	931.2	842.6	90	41.6802
393	0	0	192	0	940.6	785.6	7	27.7424
255	0	0	192	0	889.8	945	3	8.20407
158.8	238.2	0	185.7	0	1040.6	734.3	7	9.6175
239.6	359.4	0	185.7	0	941.6	664.3	7	25.4224
238.2	158.8	0	185.7	0	1040.6	734.3	7	15.6911
181.9	272.8	0	185.7	0	1012.4	714.3	28	27.9355
193.5	290.2	0	185.7	0	998.2	704.3	28	32.6267
255.5	170.3	0	185.7	0	1026.6	724.3	7	17.2362
272.8	181.9	0	185.7	0	1012.4	714.3	7	19.7652
239.6	359.4	0	185.7	0	941.6	664.3	28	39.4353
220.8	147.2	0	185.7	0	1055	744.3	28	25.745
397	0	0	185.7	0	1040.6	734.3	28	33.0824
382.5	0	0	185.7	0	1047.8	739.3	7	24.0655
210.7	316.1	0	185.7	0	977	689.3	7	21.8198
158.8	238.2	0	185.7	0	1040.6	734.3	28	21.0662
295.8	0	0	185.7	0	1091.4	769.3	7	14.8437
255.5	170.3	0	185.7	0	1026.6	724.3	28	32.0517
203.5	135.7	0	185.7	0	1076.2	759.3	7	11.9576
397	0	0	185.7	0	1040.6	734.3	7	25.4479
381.4	0	0	185.7	0	1104.6	784.3	28	22.4893
295.8	0	0	185.7	0	1091.4	769.3	28	25.2169
228	342.1	0	185.7	0	955.8	674.3	28	39.6993
220.8	147.2	0	185.7	0	1055	744.3	7	13.089
316.1	210.7	0	185.7	0	977	689.3	28	38.7003
135.7	203.5	0	185.7	0	1076.2	759.3	7	7.50701
238.1	0	0	185.7	0	1118.8	789.3	28	17.5761
339.2	0	0	185.7	0	1069.2	754.3	7	21.1793
135.7	203.5	0	185.7	0	1076.2	759.3	28	18.1987
193.5	290.2	0	185.7	0	998.2	704.3	7	17.2004
203.5	135.7	0	185.7	0	1076.2	759.3	28	22.63
290.2	193.5	0	185.7	0	998.2	704.3	7	21.8591
181.9	272.8	0	185.7	0	1012.4	714.3	7	12.3726
170.3	155.5	0	185.7	0	1026.6	724.3	28	25.7264
210.7	316.1	0	185.7	0	977	689.3	28	37.8136
228	342.1	0	185.7	0	955.8	674.3	7	21.9171
290.2	193.5	0	185.7	0	998.2	704.3	28	33.0431
381.4	0	0	185.7	0	1104.6	784.3	7	14.541
238.2	158.8	0	185.7	0	1040.6	734.3	28	26.9137
186.2	124.1	0	185.7	0	1083.4	764.3	7	7.99585
339.2	0	0	185.7	0	1069.2	754.3	28	31.9
238.1	0	0	185.7	0	1118.8	789.3	7	10.3359
252.5	0	0	185.7	0	1111.6	784.3	28	19.7652
382.5	0	0	185.7	0	1047.8	739.3	28	37.4379
252.5	0	0	185.7	0	1111.6	784.3	7	11.4839
316.1	210.7	0	185.7	0	977	689.3	7	24.4378
186.2	124.1	0	185.7	0	1083.4	764.3	28	17.5968
170.3	155.5	0	185.7	0	1026.6	724.3	7	10.7303
272.8	181.9	0	185.7	0	1012.4	714.3	28	31.3815
339	0	0	197	0	968	781	3	13.2241
339	0	0	197	0	968	781	7	20.967
339	0	0	197	0	968	781	14	27.0412
339	0	0	197	0	968	781	28	32.0399
339	0	0	197	0	968	781	90	35.1702
339	0	0	197	0	968	781	180	36.4457
339	0	0	197	0	968	781	365	38.8933
236	0	0	194	0	968	885	3	6.46728
236	0	0	194	0	968	885	14	12.838
236	0	0	194	0	968	885	28	18.4159
236	0	0	194	0	968	885	90	21.946
236	0	0	193	0	968	885	180	24.1041
236	0	0	193	0	968	885	365	25.0831
277	0	0	191	0	968	856	14	21.2634
277	0	0	191	0	968	856	28	25.9657
277	0	0	191	0	968	856	3	11.3626
277	0	0	191	0	968	856	90	31.2539
277	0	0	191	0	968	856	180	32.3295
277	0	0	191	0	968	856	360	33.7016
254	0	0	198	0	968	863	3	9.30793
254	0	0	198	0	968	863	90	26.9447
254	0	0	198	0	968	863	180	27.6273
254	0	0	198	0	968	863	365	29.7854
307	0	0	193	0	968	812	180	34.4876
307	0	0	193	0	968	812	365	36.1492
307	0	0	193	0	968	812	3	12.5416
307	0	0	193	0	968	812	28	27.5308
307	0	0	193	0	968	812	90	32.9225
236	0	0	193	0	968	885	7	9.99051
200	0	0	180	0	1125	845	7	7.83934
200	0	0	180	0	1125	845	28	12.2451
225	0	0	181	0	1113	833	7	11.1695
225	0	0	181	0	1113	833	28	17.3403
325	0	0	184	0	1063	783	7	17.5403
325	0	0	184	0	1063	783	28	30.5714
275	0	0	183	0	1088	808	7	14.2032
275	0	0	183	0	1088	808	28	24.4971
300	0	0	184	0	1075	795	7	15.5753
300	0	0	184	0	1075	795	28	26.8482
375	0	0	186	0	1038	758	7	26.0622
375	0	0	186	0	1038	758	28	38.2108
400	0	0	187	0	1025	745	28	43.699
400	0	0	187	0	1025	745	7	30.1439
250	0	0	182	0	1100	820	7	12.7346
250	0	0	182	0	1100	820	28	20.8704
350	0	0	186	0	1050	770	7	20.2775
350	0	0	186	0	1050	770	28	34.2945
203.5	305.3	0	203.5	0	963.4	630	7	19.5391
250.2	166.8	0	203.5	0	977.6	694.1	90	47.7145
157	236	0	192	0	935.4	781.2	90	43.377
141.3	212	0	203.5	0	971.8	748.5	28	29.8922
166.8	250.2	0	203.5	0	975.6	692.6	3	6.90234
122.6	183.9	0	203.5	0	958.2	800.1	90	33.1921
183.9	122.6	0	203.5	0	959.2	800	3	4.90355
102	153	0	192	0	887	942	3	4.56502
102	153	0	192	0	887	942	90	25.461
122.6	183.9	0	203.5	0	958.2	800.1	28	24.2909
166.8	250.2	0	203.5	0	975.6	692.6	28	33.9477
200	133	0	192	0	965.4	806.2	3	11.4143
108.3	162.4	0	203.5	0	938.2	849	28	20.594
305.3	203.5	0	203.5	0	965.4	631	7	25.894
108.3	162.4	0	203.5	0	938.2	849	90	29.2317
116	173	0	192	0	909.8	891.9	90	31.0237
141.3	212	0	203.5	0	971.8	748.5	7	10.3939
157	236	0	192	0	935.4	781.2	28	33.6644
133	200	0	192	0	927.4	839.2	28	27.8748
250.2	166.8	0	203.5	0	977.6	694.1	7	19.3501
173	116	0	192	0	946.8	856.8	7	11.3922
192	288	0	192	0	929.8	716.1	3	12.7884
192	288	0	192	0	929.8	716.1	28	39.3215
153	102	0	192	0	888	943.1	3	4.78221
288	192	0	192	0	932	717.8	3	16.1096
305.3	203.5	0	203.5	0	965.4	631	28	43.377
236	157	0	192	0	972.6	749.1	7	20.4161
173	116	0	192	0	946.8	856.8	3	6.94095
212	141.3	0	203.5	0	973.4	750	7	15.0306
236	157	0	192	0	972.6	749.1	3	13.5654
183.9	122.6	0	203.5	0	959.2	800	90	32.5329
166.8	250.2	0	203.5	0	975.6	692.6	7	15.7483
102	153	0	192	0	887	942	7	7.67594
288	192	0	192	0	932	717.8	28	38.8044
212	141.3	0	203.5	0	973.4	750	28	33.0038
102	153	0	192	0	887	942	28	17.2755
173	116	0	192	0	946.8	856.8	28	24.282
183.9	122.6	0	203.5	0	959.2	800	28	24.0462
133	200	0	192	0	927.4	839.2	90	36.5884
192	288	0	192	0	929.8	716.1	90	50.7323
133	200	0	192	0	927.4	839.2	7	13.664
305.3	203.5	0	203.5	0	965.4	631	3	14.1439
236	157	0	192	0	972.6	749.1	90	47.7821
108.3	162.4	0	203.5	0	938.2	849	3	2.33181
157	236	0	192	0	935.4	781.2	7	16.8894
288	192	0	192	0	932	717.8	7	23.5235
212	141.3	0	203.5	0	973.4	750	3	6.80858
212	141.3	0	203.5	0	973.4	750	90	39.7
153	102	0	192	0	888	943.1	28	17.9643
236	157	0	192	0	972.6	749.1	28	32.8846
116	173	0	192	0	909.8	891.9	28	22.348
183.9	122.6	0	203.5	0	959.2	800	7	10.7875
108.3	162.4	0	203.5	0	938.2	849	7	7.72351
203.5	305.3	0	203.5	0	963.4	630	28	41.6843
203.5	305.3	0	203.5	0	963.4	630	3	9.56165
133	200	0	192	0	927.4	839.2	3	6.88373
288	192	0	192	0	932	717.8	90	50.5269
200	133	0	192	0	965.4	806.2	7	17.1659
200	133	0	192	0	965.4	806.2	28	30.4397
250.2	166.8	0	203.5	0	977.6	694.1	3	9.73126
122.6	183.9	0	203.5	0	958.2	800.1	3	3.31983
153	102	0	192	0	888	943.1	90	26.3228
200	133	0	192	0	965.4	806.2	90	43.2508
116	173	0	192	0	909.8	891.9	3	6.28044
173	116	0	192	0	946.8	856.8	90	32.1027
250.2	166.8	0	203.5	0	977.6	694.1	28	36.9642
305.3	203.5	0	203.5	0	965.4	631	90	54.5989
192	288	0	192	0	929.8	716.1	7	21.4806
157	236	0	192	0	935.4	781.2	3	9.69472
153	102	0	192	0	888	943.1	7	8.37438
141.3	212	0	203.5	0	971.8	748.5	90	39.6621
116	173	0	192	0	909.8	891.9	7	10.0898
141.3	212	0	203.5	0	971.8	748.5	3	4.82771
122.6	183.9	0	203.5	0	958.2	800.1	7	10.3546
166.8	250.2	0	203.5	0	975.6	692.6	90	43.5652
203.5	305.3	0	203.5	0	963.4	630	90	51.8638
310	0	0	192	0	1012	830	3	11.8521
310	0	0	192	0	1012	830	7	17.2438
310	0	0	192	0	1012	830	28	27.8273
310	0	0	192	0	1012	830	90	35.7631
310	0	0	192	0	1012	830	120	38.7003
331	0	0	192	0	1025	821	3	14.3066
331	0	0	192	0	1025	821	7	17.4368
331	0	0	192	0	1025	821	28	31.7435
331	0	0	192	0	1025	821	90	37.9143
331	0	0	192	0	1025	821	120	39.3829
349	0	0	192	0	1056	809	3	15.8717
349	0	0	192	0	1056	809	7	9.01145
349	0	0	192	0	1056	809	28	33.6051
349	0	0	192	0	1056	809	90	40.6584
349	0	0	192	0	1056	809	120	40.8583
238	0	0	186	0	1119	789	7	12.052
238	0	0	186	0	1119	789	28	17.5403
296	0	0	186	0	1090	769	7	18.9123
296	0	0	186	0	1090	769	28	25.1797
297	0	0	186	0	1040	734	7	30.9575
480	0	0	192	0	936	721	28	43.892
480	0	0	192	0	936	721	90	54.2756
397	0	0	186	0	1040	734	28	36.9352
281	0	0	186	0	1104	774	7	14.4997
281	0	0	185	0	1104	774	28	22.4355
500	0	0	200	0	1125	613	1	12.6381
500	0	0	200	0	1125	613	3	26.0622
500	0	0	200	0	1125	613	7	33.2121
500	0	0	200	0	1125	613	14	36.9352
500	0	0	200	0	1125	613	28	44.092
540	0	0	173	0	1125	613	7	52.6139
540	0	0	173	0	1125	613	14	59.7638
540	0	0	173	0	1125	613	28	67.3066
540	0	0	173	0	1125	613	90	69.6578
540	0	0	173	0	1125	613	180	71.6228
540	0	0	173	0	1125	613	270	74.1669
350	0	0	203	0	974	775	7	18.1263
350	0	0	203	0	974	775	14	22.5321
350	0	0	203	0	974	775	28	27.3377
350	0	0	203	0	974	775	56	29.9784
350	0	0	203	0	974	775	90	31.3505
350	0	0	203	0	974	775	180	32.7225
385	0	0	186	0	966	763	1	6.26734
385	0	0	186	0	966	763	3	14.6996
385	0	0	186	0	966	763	7	23.2216
385	0	0	186	0	966	763	14	27.9238
385	0	0	186	0	966	763	28	31.3505
331	0	0	192	0	978	825	180	38.9968
331	0	0	192	0	978	825	360	41.2445
349	0	0	192	0	1047	806	3	14.9892
331	0	0	192	0	978	825	3	13.5206
382	0	0	186	0	1047	739	7	24.0007
382	0	0	186	0	1047	739	28	37.4248
382	0	0	186	0	1111	784	7	11.466
281	0	0	186	0	1104	774	28	22.4355
339	0	0	185	0	1069	754	7	21.16
339	0	0	185	0	1069	754	28	31.84
295	0	0	185	0	1069	769	7	14.7962
295	0	0	185	0	1069	769	28	25.1797
238	0	0	185	0	1118	789	28	17.5403
296	0	0	192	0	1085	765	7	14.2032
296	0	0	192	0	1085	765	28	21.6495
296	0	0	192	0	1085	765	90	29.3924
331	0	0	192	0	879	825	3	13.5206
331	0	0	192	0	978	825	7	16.2647
331	0	0	192	0	978	825	28	31.447
331	0	0	192	0	978	825	90	37.2317
349	0	0	192	0	1047	806	7	18.1263
349	0	0	192	0	1047	806	28	32.7225
349	0	0	192	0	1047	806	90	39.4863
349	0	0	192	0	1047	806	180	41.0514
349	0	0	192	0	1047	806	360	42.127
302	0	0	203	0	974	817	14	18.1263
302	0	0	203	0	974	817	180	26.7448
525	0	0	189	0	1125	613	180	61.9218
500	0	0	200	0	1125	613	90	47.2222
500	0	0	200	0	1125	613	180	51.0419
500	0	0	200	0	1125	613	270	55.1581
540	0	0	173	0	1125	613	3	41.6375
252	0	0	185	0	1111	784	7	13.7137
252	0	0	185	0	1111	784	28	19.6914
339	0	0	185	0	1060	754	28	31.6469
393	0	0	192	0	940	758	3	19.1054
393	0	0	192	0	940	758	28	39.5828
393	0	0	192	0	940	758	90	48.7942
382	0	0	185	0	1047	739	7	24.0007
382	0	0	185	0	1047	739	28	37.4248
252	0	0	186	0	1111	784	7	11.466
252	0	0	185	0	1111	784	28	19.6914
310	0	0	192	0	970	850	7	14.9892
310	0	0	192	0	970	850	28	27.9238
310	0	0	192	0	970	850	90	34.6806
310	0	0	192	0	970	850	180	37.3282
310	0	0	192	0	970	850	360	38.1142
525	0	0	189	0	1125	613	3	33.7981
525	0	0	189	0	1125	613	7	42.4235
525	0	0	189	0	1125	613	14	48.4012
525	0	0	189	0	1125	613	28	55.9441
525	0	0	189	0	1125	613	90	58.7847
525	0	0	189	0	1125	613	270	67.1136
322	0	0	203	0	974	800	14	20.7739
322	0	0	203	0	974	800	28	25.1797
322	0	0	203	0	974	800	180	29.5854
302	0	0	203	0	974	817	28	21.753
397	0	0	185	0	1040	734	28	39.0933
480	0	0	192	0	936	721	3	24.3937
522	0	0	146	0	896	896	7	50.511
522	0	0	146	0	896	896	28	74.9874
273	105	82	210	9	904	680	28	37.1697
162	190	148	179	19	838	741	28	33.7567
154	144	112	220	10	923	658	28	16.4992
147	115	89	202	9	860	829	28	19.9879
152	178	139	168	18	944	695	28	36.3492
310	143	111	168	22	914	651	28	33.6878
144	0	175	158	18	943	844	28	15.4167
304	140	0	214	6	895	722	28	33.4189
374	0	0	190	7	1013	730	28	39.0519
159	149	116	175	15	953	720	28	27.6756
153	239	0	200	6	1002	684	28	26.8551
310	143	0	168	10	914	804	28	45.2986
305	0	100	196	10	959	705	28	30.1232
151	0	184	167	12	991	772	28	15.5684
142	167	130	174	11	883	785	28	44.6091
298	137	107	201	6	878	655	28	53.524
321	164	0	190	5	870	774	28	57.2127
366	187	0	191	7	824	757	28	65.907
280	129	100	172	9	825	805	28	52.8208
252	97	76	194	8	835	821	28	33.3982
165	0	150	182	12	1023	729	28	18.0298
156	243	0	180	11	1022	698	28	37.3627
160	188	146	203	11	829	710	28	32.8397
298	0	107	186	6	879	815	28	42.6372
318	0	126	210	6	861	737	28	40.0586
287	121	94	188	9	904	696	28	41.9408
326	166	0	174	9	882	790	28	61.2324
356	0	142	193	11	801	778	28	40.8652
132	207	161	179	5	867	736	28	33.3017
322	149	0	186	8	951	709	28	52.4209
164	0	200	181	13	849	846	28	15.0857
314	0	113	170	10	925	783	28	38.459
321	0	128	182	11	870	780	28	37.2593
140	164	128	237	6	869	656	28	35.2253
288	121	0	177	7	908	829	28	42.1339
298	0	107	210	11	880	744	28	31.8745
265	111	86	195	6	833	790	28	41.5409
160	250	0	168	12	1049	688	28	39.4518
166	260	0	183	13	859	827	28	37.9143
276	116	90	180	9	870	768	28	44.2781
322	0	116	196	10	818	813	28	31.1781
149	139	109	193	6	892	780	28	23.6904
159	187	0	176	11	990	789	28	32.7639
261	100	78	201	9	864	761	28	32.3985
237	92	71	247	6	853	695	28	28.627
313	0	113	178	8	1002	689	28	36.8042
155	183	0	193	9	1047	697	28	18.2849
146	230	0	202	3	827	872	28	33.0604
296	0	107	221	11	819	778	28	31.4194
133	210	0	196	3	949	795	28	31.0264
313	145	0	178	8	867	824	28	44.3885
152	0	112	184	8	992	816	28	12.1761
153	145	113	178	8	1002	689	28	25.5589
140	133	103	200	7	916	753	28	36.4388
149	236	0	176	13	847	893	28	32.957
300	0	120	212	10	878	728	28	23.8352
153	145	113	178	8	867	824	28	26.2277
148	0	137	158	16	1002	830	28	17.954
326	0	138	199	11	801	792	28	40.6791
153	145	0	178	8	1000	822	28	19.0089
262	111	86	195	5	895	733	28	33.7154
158	0	195	220	11	898	713	28	8.53571
151	0	185	167	16	1074	678	28	13.4586
273	0	90	199	11	931	762	28	32.2399
149	118	92	183	7	953	780	28	23.518
143	169	143	191	8	967	643	28	29.7233
260	101	78	171	10	936	763	28	49.7733
313	161	0	178	10	917	759	28	52.4415
284	120	0	168	7	970	794	28	40.9342
336	0	0	182	3	986	817	28	44.8642
145	0	134	181	11	979	812	28	13.1966
150	237	0	174	12	1069	675	28	37.4317
144	170	133	192	8	814	805	28	29.8681
331	170	0	195	8	811	802	28	56.6129
155	0	143	193	9	1047	697	28	12.4588
155	183	0	193	9	877	868	28	23.7869
135	0	166	180	10	961	805	28	13.2931
266	112	87	178	10	910	745	28	39.4173
314	145	113	179	8	869	690	28	46.2294
313	145	0	127	8	1000	822	28	44.5195
146	173	0	182	3	986	817	28	23.7387
144	136	106	178	7	941	774	28	26.1449
148	0	182	181	15	839	884	28	15.5201
277	117	91	191	7	946	666	28	43.5749
298	0	107	164	13	953	784	28	35.8596
313	145	0	178	8	1002	689	28	41.0514
155	184	143	194	9	880	699	28	28.9856
289	134	0	195	6	924	760	28	46.2432
148	175	0	171	2	1000	828	28	26.9171
145	0	179	202	8	824	869	28	10.5352
313	0	0	178	8	1000	822	28	25.0969
136	162	126	172	10	923	764	28	29.0683
155	0	143	193	9	877	868	28	9.7354
255	99	77	189	6	919	749	28	33.7981
162	207	172	216	10	822	638	28	39.8448
136	196	98	199	6	847	783	28	26.9654
164	163	128	197	8	961	641	28	27.2343
162	214	164	202	10	820	680	28	30.6472
157	214	152	200	9	819	704	28	33.0535
149	153	194	192	8	935	623	28	24.5798
135	105	193	196	6	965	643	28	21.9115
159	209	161	201	7	848	669	28	30.8816
144	15	195	176	6	1021	709	28	15.3408
154	174	185	228	7	845	612	28	24.3385
167	187	195	185	7	898	636	28	23.8903
184	86	190	213	6	923	623	28	22.932
156	178	187	221	7	854	614	28	29.413
236.9	91.7	71.5	246.9	6	852.9	695.4	28	28.6298
313.3	0	113	178.5	8	1001.9	688.7	28	36.8049
154.8	183.4	0	193.3	9.1	1047.4	696.7	28	18.2877
145.9	230.5	0	202.5	3.4	827	871.8	28	32.7205
296	0	106.7	221.4	10.5	819.2	778.4	28	31.4201
133.1	210.2	0	195.7	3.1	949.4	795.3	28	28.938
313.3	145	0	178.5	8	867.2	824	28	40.9252
151.6	0	111.9	184.4	7.9	992	815.9	28	12.181
153.1	145	113	178.5	8	1001.9	688.7	28	25.5596
139.9	132.6	103.3	200.3	7.4	916	753.4	28	36.4436
149.5	236	0	175.8	12.6	846.8	892.7	28	32.9638
299.8	0	119.8	211.5	9.9	878.2	727.6	28	23.8359
153.1	145	113	178.5	8	867.2	824	28	26.2332
148.1	0	136.6	158.1	16.1	1001.8	830.1	28	17.9595
326.5	0	137.9	199	10.8	801.1	792.5	28	38.6307
152.7	144.7	0	178.1	8	999.7	822.2	28	19.0095
261.9	110.5	86.1	195.4	5	895.2	732.6	28	33.7188
158.4	0	194.9	219.7	11	897.7	712.9	28	8.5364
150.7	0	185.3	166.7	15.6	1074.5	678	28	13.4613
272.6	0	89.6	198.7	10.6	931.3	762.2	28	32.2454
149	117.6	91.7	182.9	7.1	953.4	780.3	28	23.5242
143	169.4	142.7	190.7	8.4	967.4	643.5	28	29.7261
259.9	100.6	78.4	170.6	10.4	935.7	762.9	28	49.7733
312.9	160.5	0	177.6	9.6	916.6	759.5	28	52.4464
284	119.7	0	168.3	7.2	970.4	794.2	28	40.9349
336.5	0	0	181.9	3.4	985.8	816.8	28	44.8683
144.8	0	133.6	180.8	11.1	979.5	811.5	28	13.2021
150	236.8	0	173.8	11.9	1069.3	674.8	28	37.4317
143.7	170.2	132.6	191.6	8.5	814.1	805.3	28	29.8709
330.5	169.6	0	194.9	8.1	811	802.3	28	56.6191
154.8	0	142.8	193.3	9.1	1047.4	696.7	28	12.4595
154.8	183.4	0	193.3	9.1	877.2	867.7	28	23.7869
134.7	0	165.7	180.2	10	961	804.9	28	13.2938
266.2	112.3	87.5	177.9	10.4	909.7	744.5	28	39.4215
314	145.3	113.2	178.9	8	869.1	690.2	28	46.2342
312.7	144.7	0	127.3	8	999.7	822.2	28	44.5236
145.7	172.6	0	181.9	3.4	985.8	816.8	28	23.7442
143.8	136.3	106.2	178.1	7.5	941.5	774.3	28	26.1477
148.1	0	182.1	181.4	15	838.9	884.3	28	15.5263
277	116.8	91	190.6	7	946.5	665.6	28	43.5783
298.1	0	107.5	163.6	12.8	953.2	784	28	35.8659
313.3	145	0	178.5	8	1001.9	688.7	28	41.0535
155.2	183.9	143.2	193.8	9.2	879.6	698.5	28	28.9911
289	133.7	0	194.9	5.5	924.1	760.1	28	46.2473
147.8	175.1	0	171.2	2.2	1000	828.5	28	26.9227
145.4	0	178.9	201.7	7.8	824	868.7	28	10.5359
312.7	0	0	178.1	8	999.7	822.2	28	25.1038
136.4	161.6	125.8	171.6	10.4	922.6	764.4	28	29.0731
154.8	0	142.8	193.3	9.1	877.2	867.7	28	9.73816
255.3	98.8	77	188.6	6.5	919	749.3	28	33.7988
272.8	105.1	81.8	209.7	9	904	679.7	28	37.171
162	190.1	148.1	178.8	18.8	838.1	741.4	28	33.7623
153.6	144.2	112.3	220.1	10.1	923.2	657.9	28	16.504
146.5	114.6	89.3	201.9	8.8	860	829.5	28	19.9879
151.8	178.1	138.7	167.5	18.3	944	694.6	28	36.3499
309.9	142.8	111.2	167.8	22.1	913.9	651.2	28	38.2156
143.6	0	174.9	158.4	17.9	942.7	844.5	28	15.4236
303.6	139.9	0	213.5	6.2	895.5	722.5	28	33.4196
374.3	0	0	190.2	6.7	1013.2	730.4	28	39.0561
158.6	148.9	116	175.1	15	953.3	719.7	28	27.6811
152.6	238.7	0	200	6.3	1001.8	683.9	28	26.8599
310	142.8	0	167.9	10	914.3	804	28	45.3048
304.8	0	99.6	196	9.8	959.4	705.2	28	30.1232
150.9	0	183.9	166.6	11.6	991.2	772.2	28	15.5697
141.9	166.6	129.7	173.5	10.9	882.6	785.3	28	44.6119
297.8	137.2	106.9	201.3	6	878.4	655.3	28	53.5247
321.3	164.2	0	190.5	4.6	870	774	28	57.2182
366	187	0	191.3	6.6	824.3	756.9	28	65.9091
279.8	128.9	100.4	172.4	9.5	825.1	804.9	28	52.827
252.1	97.1	75.6	193.8	8.3	835.5	821.4	28	33.3996
164.6	0	150.4	181.6	11.7	1023.3	728.9	28	18.0339
155.6	243.5	0	180.3	10.7	1022	697.7	28	37.3634
160.2	188	146.4	203.2	11.3	828.7	709.7	28	35.3143
298.1	0	107	186.4	6.1	879	815.2	28	42.6441
317.9	0	126.5	209.7	5.7	860.5	736.6	28	40.062
287.3	120.5	93.9	187.6	9.2	904.4	695.9	28	43.7983
325.6	166.4	0	174	8.9	881.6	790	28	61.2358
355.9	0	141.6	193.3	11	801.4	778.4	28	40.8687
132	206.5	160.9	178.9	5.5	866.9	735.6	28	33.3065
322.5	148.6	0	185.8	8.5	951	709.5	28	52.4264
164.2	0	200.1	181.2	12.6	849.3	846	28	15.0913
313.8	0	112.6	169.9	10.1	925.3	782.9	28	38.461
321.4	0	127.9	182.5	11.5	870.1	779.7	28	37.2655
139.7	163.9	127.7	236.7	5.8	868.6	655.6	28	35.2253
288.4	121	0	177.4	7	907.9	829.5	28	42.1401
298.2	0	107	209.7	11.1	879.6	744.2	28	31.8752
264.5	111	86.5	195.5	5.9	832.6	790.4	28	41.5423
159.8	250	0	168.4	12.2	1049.3	688.2	28	39.456
166	259.7	0	183.2	12.7	858.8	826.8	28	37.917
276.4	116	90.3	179.6	8.9	870.1	768.3	28	44.2844
322.2	0	115.6	196	10.4	817.9	813.4	28	31.1788
148.5	139.4	108.6	192.7	6.1	892.4	780	28	23.6966
159.1	186.7	0	175.6	11.3	989.6	788.9	28	32.768
260.9	100.5	78.3	200.6	8.6	864.5	761.5	28	32.4012
